# Supplementary material for: 19F NMR-, ESR-, and vis-NIR-spectroelectrochemical study of the unconventional reduction behaviour of a perfluoroalkylated fullerene: dimerization of the C70(CF3)10− radical anion
Source: Royal Society of Chemistry journal article supplement (doi:10.1039/c5an01129a), 2015-01-01
Supplement: c5an01129a1.pdf [file c5an01129a1.pdf]

# **$^{19}\text{F}$ NMR-, ESR-, and vis-NIR-spectroelectrochemical study of the unconventional reduction behaviour of perfluoroalkylated fullerene: dimerization of the $\text{C}_{70}(\text{CF}_3)_{10}^-$ radical anion**

Michal Zalibera,<sup>\*a,b,c</sup> Peter Machata,<sup>a,d</sup> Tyler T. Clikeman,<sup>e</sup> Marco Rosenkranz,<sup>a</sup> Steven H. Strauss,<sup>\*e</sup> Olga V. Boltalina,<sup>\*e</sup> and Alexey A. Popov<sup>\*a</sup>

## **Supporting Information**

|                                                |   |
|------------------------------------------------|---|
| Fast scan cyclic voltammetry of <b>70-10-1</b> | 2 |
| Charge-to-spin ratio                           | 3 |
| $^{19}\text{F}$ - $^{19}\text{F}$ 2D COSY NMR  | 4 |
| NMR spectroelectrochemical cell                | 6 |
| Mass spectrometry results                      | 7 |
| DFT results                                    | 8 |

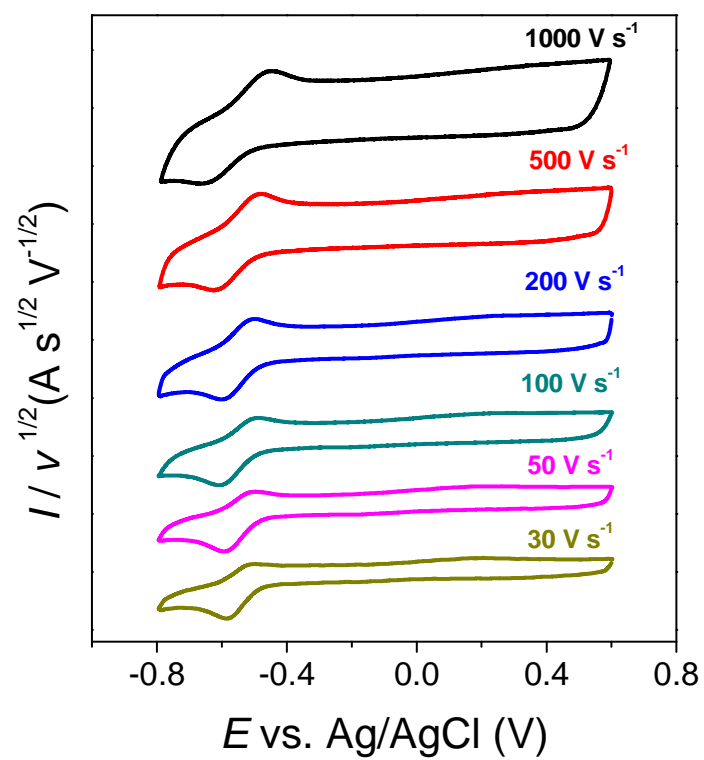

**Figure S1.** Cyclic voltammograms of **70-10-1** in *o*-DCB measured at different scan rates.

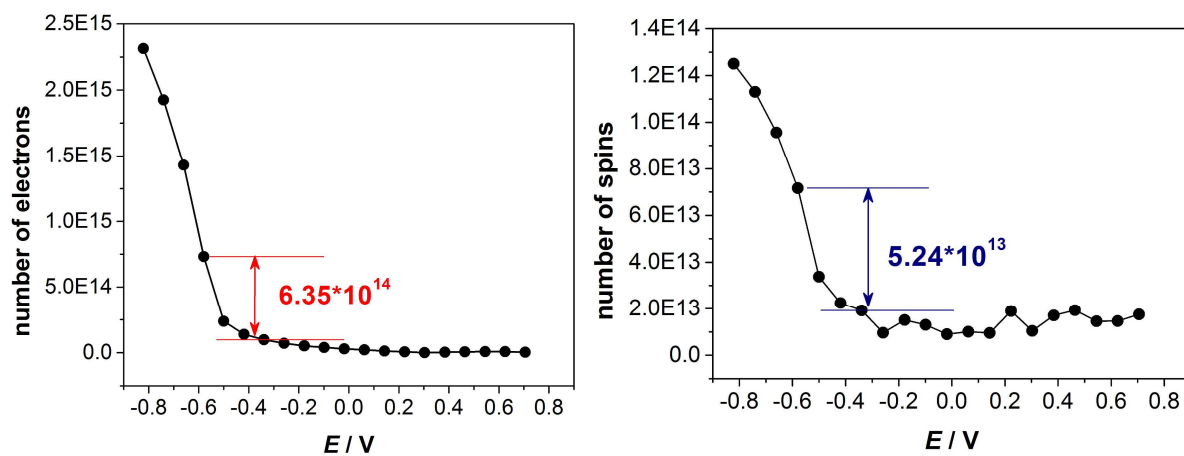

**Figure S2.** Number of transferred electrons (left) and formed spins (right) during the cyclic voltammetry of **70-10-1** at the first reduction step (scan rate 5 mV/s). At the beginning of the reduction process, the growth of the number of transferred electrons ( $6.35 \times 10^{14}$ ) to the number of unpaired spins observed ( $5.24 \times 10^{13}$ ) is 12:1. Measurements at later times gives less meaningful results due to the diffusion of radical out of the sensitive part of the ESR cavity.

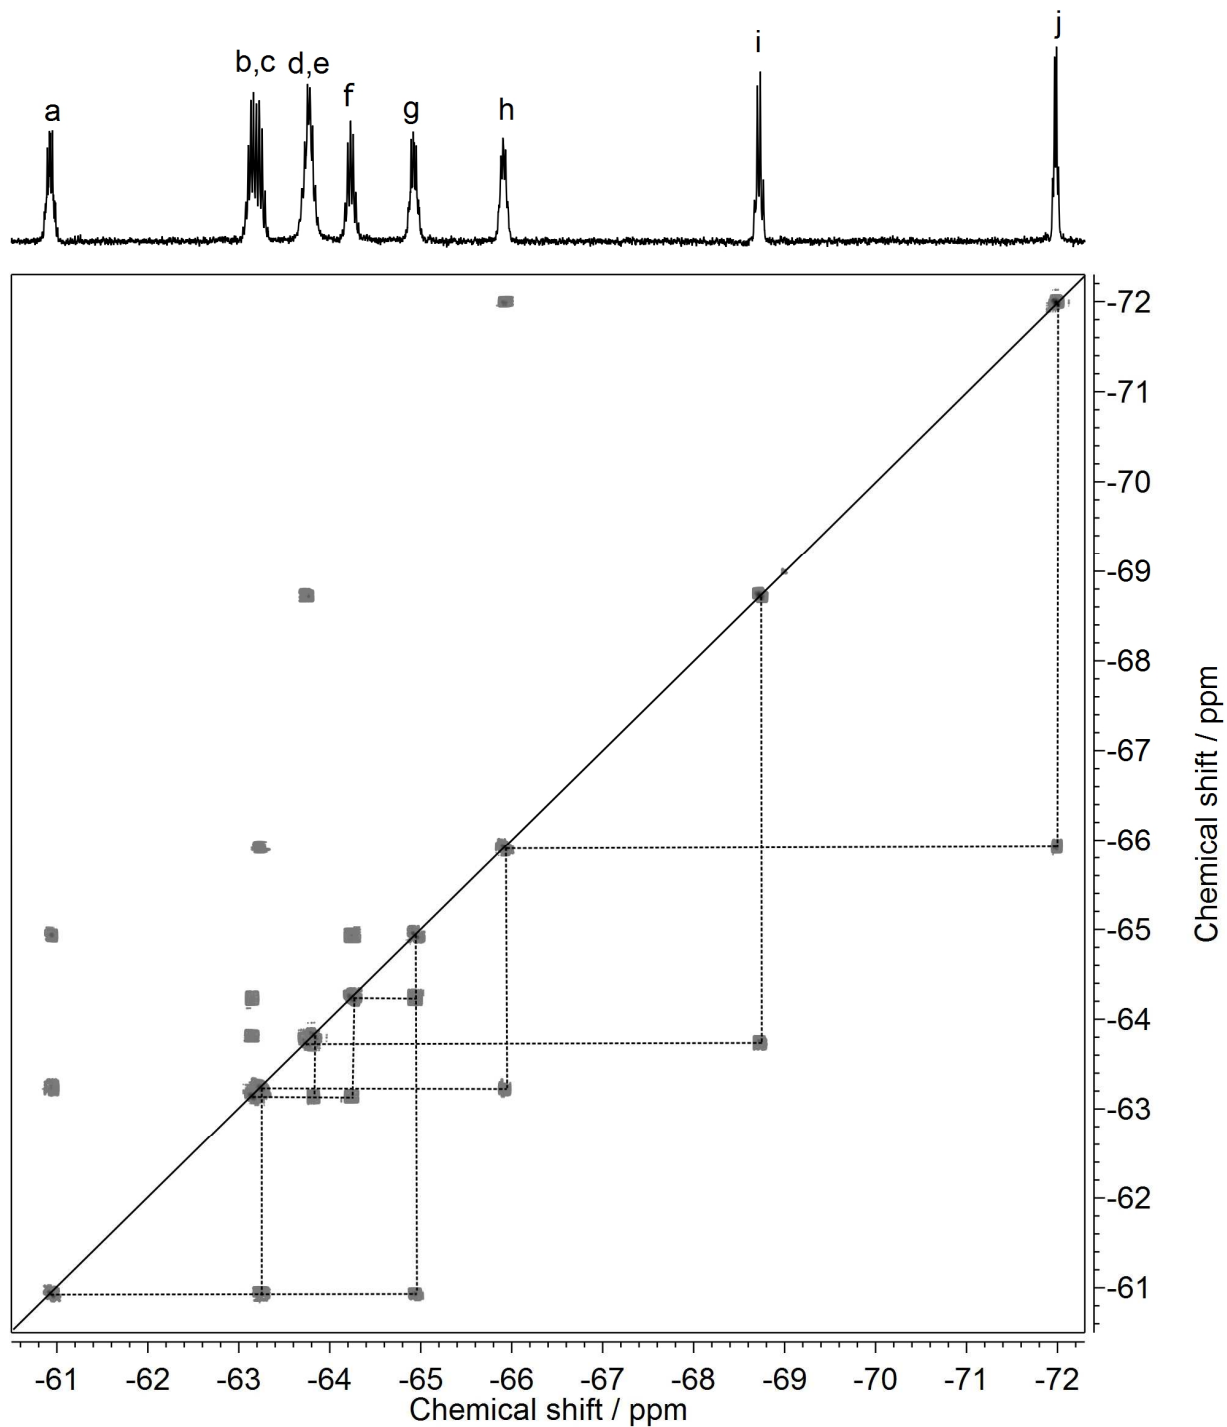

**Figure S3.**  $^{19}\text{F}$ - $^{19}\text{F}$  2D COSY NMR spectrum of **70-10-1** (470.59 MHz, *o*-DCB- $d_4$ , 298 K,  $\text{C}_6\text{F}_6$  int. std. ( $\delta$  -164.9)).

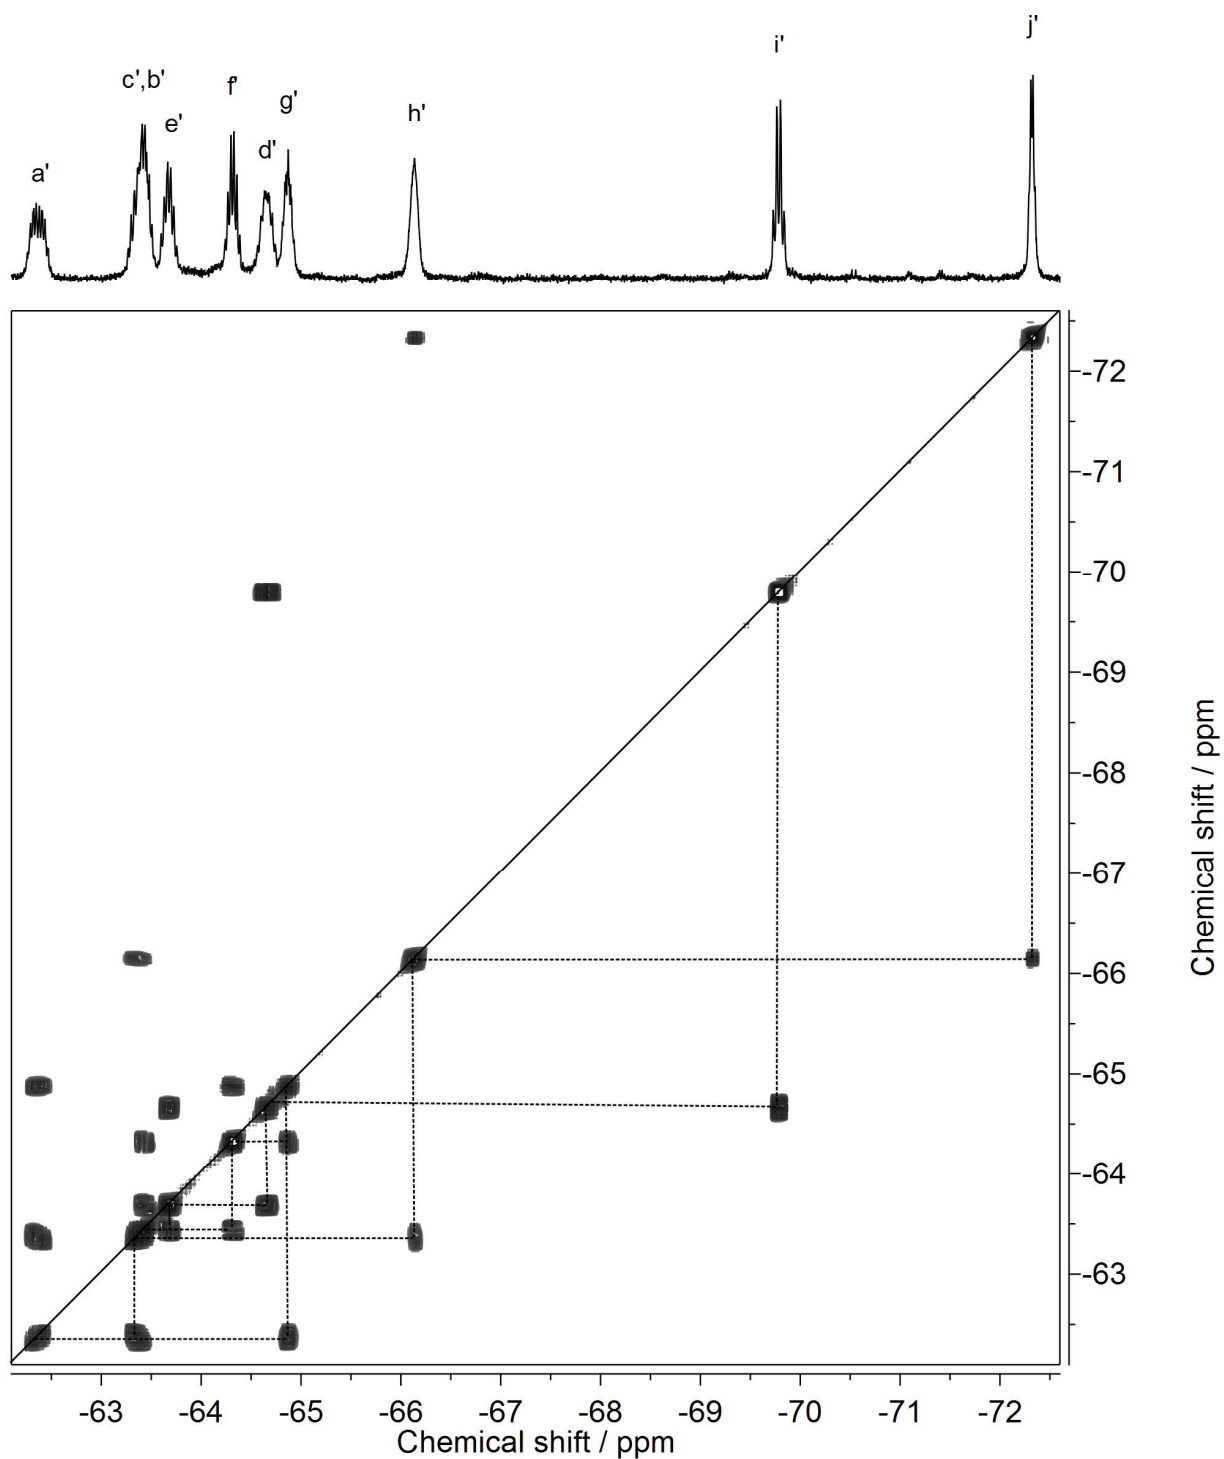

**Figure S4.**  $^{19}\text{F}$ - $^{19}\text{F}$  2D COSY NMR spectrum of  $(70-10-1)_2^{2-}$  obtained by the reaction of **70-10-1** with  $\text{CoCp}_2$  (470.59 MHz, *o*-DCB- $d_4$ , 298 K,  $\text{C}_6\text{F}_6$  int. std. ( $\delta -164.9$ )).

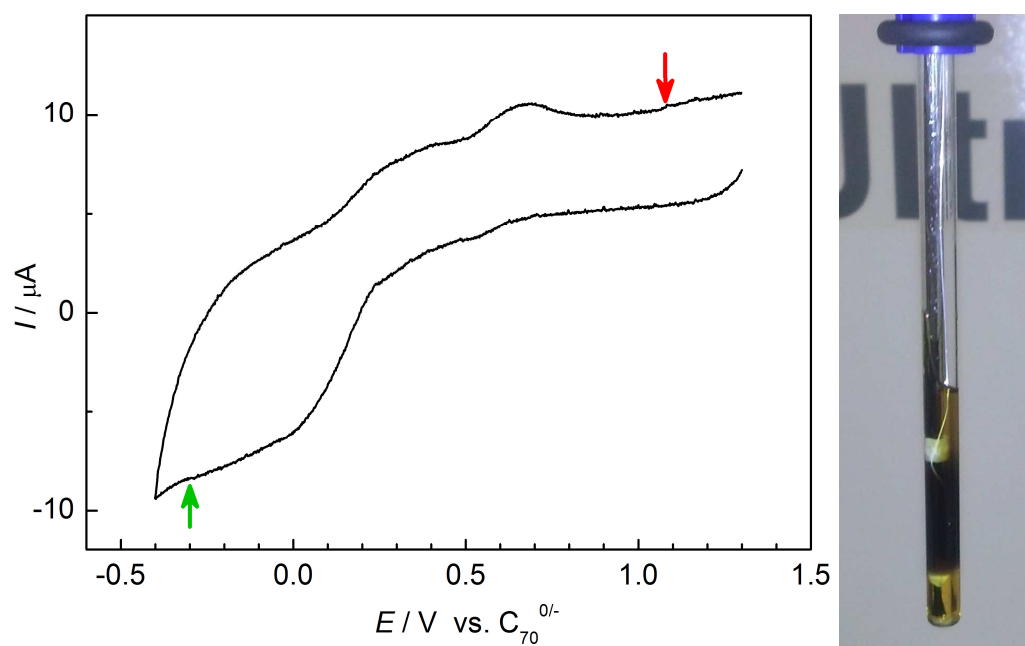

**Figure S5.** (Left) Cyclic voltammetry of **70-10-1** in *o*-DCB recorded at 0.003 V/s in the electrochemical-NMR cell; green/red arrows indicate the potentials of the reduction/reoxidation corresponding to Fig. 4 in the main text. (Right) Photograph of an *o*-DCB- $d_4$  solution of **70-10-1** in the spectroelectrochemical NMR cell after reduction at  $-0.3 \text{ V vs. } C_{70}^{0/-}$  for 6 h.

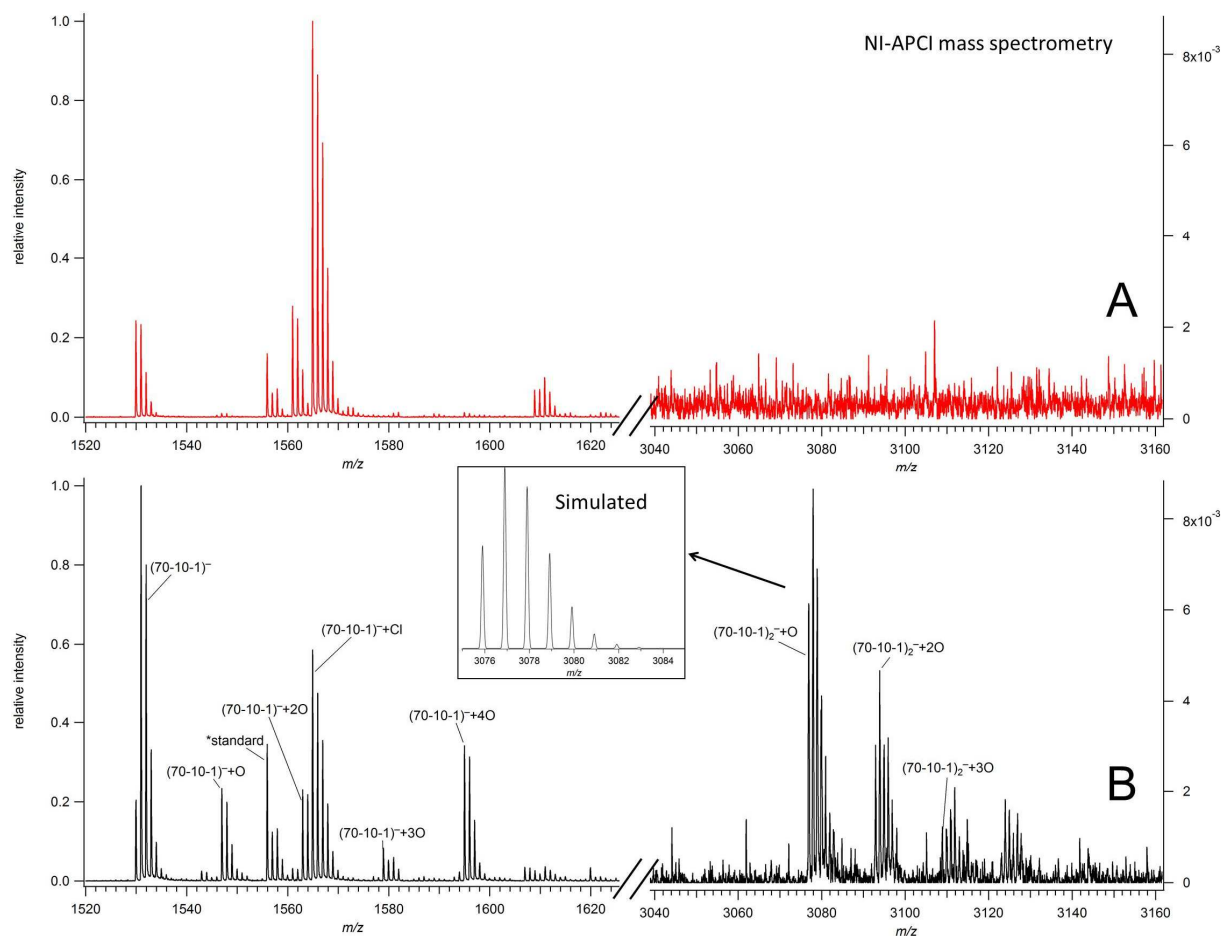

**Figure S6.** NI-APCI mass spectra of **70-10-1** (upper spectrum) and **70-10-1** reduced with CoCp<sub>2</sub> (lower spectrum). In the upper spectrum, the M<sup>+</sup> molecular anion (**70-10-1**)<sup>-</sup> at *m/z* 1530 and its (M+Cl)<sup>-</sup> adduct with a Cl atom (from CH<sub>2</sub>Cl<sub>2</sub>) at *m/z* 1565 are present. In the bottom spectrum, in the lower mass range, anionic species due to hydrogenated and oxidized monomer, as well as the adduct with a Cl atom, are present; in the higher mass region, mono- and multiply-oxidized dimeric species are present (note the ca. two orders of magnitude lower intensities of the peaks for the dimeric species).

**Table S1.** DFT-predicted relative energies of (70-10-1)(CH<sub>3</sub>)<sup>-</sup> monoanions and (70-10-1)<sub>2</sub><sup>2-</sup> dimeric dianions (kJ/mol)

| C# <sup>a</sup> | (70-10-1)(CH <sub>3</sub> ) <sup>-</sup> | (70-10-1) <sub>2</sub> <sup>2-</sup> |             |
|-----------------|------------------------------------------|--------------------------------------|-------------|
|                 | PBE/TZ2P                                 | PBE/TZ2P                             | PBE-D3/TZ2P |
| 34              | 0.0                                      | 0.0                                  | 0.0         |
| 33              | 9.1                                      | 19.7                                 | 17.5        |
| 13              | 17.7                                     | 58.1                                 | 29.0        |
| 35              | 18.2                                     | 37.4                                 | 30.7        |
| 54              | 18.9                                     | 39.8                                 | 33.8        |
| 32              | 24.1                                     | 52.6                                 | 38.7        |
| 14              | 26.8                                     | 58.8                                 | 43.2        |
| 55              | 25.3                                     | 52.5                                 | 45.1        |
| 36              | 25.8                                     | 56.1                                 | 48.8        |
| 53              | 4.4                                      | 81.4                                 | 58.5        |
| 15              | 8.9                                      | 88.1                                 | 61.0        |
| 16              | 5.1                                      | 84.4                                 | 61.5        |
| 46              | 13.4                                     | 100.2                                | 66.2        |
| 56              | 10.1                                     | 96.1                                 | 68.3        |
| 44              | 8.4                                      | 109.9                                | 69.3        |
| 52              | 16.2                                     | 106.5                                | 81.4        |
| 37              | 10.5                                     | 119.6                                | 92.2        |
| 29              | 14.1                                     |                                      |             |
| 47              | 29.6                                     |                                      |             |
| 45              | 30.7                                     |                                      |             |
| 38              | 34.5                                     |                                      |             |
| 31              | 34.5                                     |                                      |             |
| 57              | 37.2                                     |                                      |             |
| 63              | 39.3                                     |                                      |             |
| 7               | 40.0                                     |                                      |             |
| 62              | 47.7                                     |                                      |             |
| 22              | 48.1                                     |                                      |             |
| 23              | 50.8                                     |                                      |             |
| 30              | 57.7                                     |                                      |             |
| 12              | 64.7                                     |                                      |             |
| 28              | 65.8                                     |                                      |             |

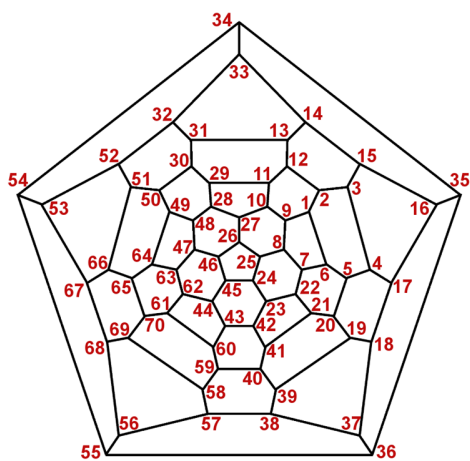

<sup>a</sup> see the Schlegel diagram for the IUPAC numbering system of cage C atoms in 70-10-1; positions adjacent to CF<sub>3</sub> groups were not considered because they are sterically hindered from dimerization



**Table S2.** Cartesian coordinates for DFT-optimized (70-10-1)<sub>2</sub><sup>2-</sup> with a C34–C34 bond.

|   |              |              |              |
|---|--------------|--------------|--------------|
| C | 0.046751440  | 0.923913000  | 3.503676870  |
| C | -3.075469950 | 0.972552410  | 0.694566180  |
| C | -1.372059810 | 0.956539040  | -3.139363110 |
| C | 2.790461580  | 0.944136670  | -2.739975650 |
| C | 3.584031920  | 0.909560430  | -1.534065210 |
| C | 2.820523870  | 0.935308180  | 2.592782740  |
| C | -1.328907160 | 0.928836220  | 3.061601550  |
| C | -3.079433150 | 0.979720790  | -0.747707770 |
| C | -0.005625530 | 0.953656540  | -3.589939350 |
| C | 3.603970870  | 0.916297180  | 1.386328650  |
| C | 0.780805460  | -0.262632330 | 3.424942150  |
| C | -3.053660900 | -0.321323550 | 1.507136100  |
| C | -1.930666040 | -0.225144340 | -2.636070070 |
| C | 2.269043040  | -0.344372130 | -3.350132530 |
| C | 3.763957680  | 2.105209990  | 0.640217750  |
| C | 0.840293600  | 2.219617160  | 3.720880160  |
| C | -2.754832870 | 2.145432350  | 1.383295530  |
| C | -2.131360000 | 2.252280830  | -2.852959430 |
| C | 2.160686470  | 2.150501520  | -3.089197120 |
| C | 3.755005720  | 2.103480070  | -0.783915170 |
| C | 2.197825350  | 2.133666260  | 2.965023160  |
| C | -2.084457700 | 2.226403750  | 2.785497750  |
| C | -2.772640160 | 2.156006750  | -1.435109220 |
| C | 0.785268600  | 2.244051760  | -3.809407850 |
| C | 3.769332860  | -0.290227560 | -0.781231390 |
| C | 2.317230210  | -0.359587160 | 3.212789850  |
| C | -1.904551050 | -0.238467420 | 2.560139370  |
| C | -3.055345940 | -0.309332840 | -1.564702570 |
| C | 0.734355940  | -0.227522070 | -3.508610950 |
| C | 3.750554100  | -0.286791350 | 0.618305200  |
| C | 0.182714880  | -1.445361650 | 2.926484190  |
| C | -2.552755370 | -1.486265630 | 0.650465000  |
| C | -1.170418590 | -1.412513970 | -2.589035510 |
| C | 2.367506050  | -1.544756840 | -2.375373830 |
| C | 3.182281010  | 3.356290810  | 1.071943280  |
| C | 0.192792990  | 3.388936960  | 2.976546540  |
| C | -2.448842440 | 3.328469580  | 0.675740970  |
| C | -1.157627930 | 3.413753950  | -2.634236260 |
| C | 2.366472890  | 3.344225130  | -2.352683210 |
| C | 3.165929600  | 3.358470700  | -1.197379180 |
| C | 2.399855040  | 3.334344650  | 2.240973470  |
| C | -1.118943540 | 3.395768510  | 2.573491380  |

|   |              |              |              |
|---|--------------|--------------|--------------|
| C | -2.461150030 | 3.334879150  | -0.722910980 |
| C | 0.147753910  | 3.409649280  | -3.054725510 |
| C | 3.433335120  | -1.690721980 | -1.315270100 |
| C | 2.393934230  | -1.545588410 | 2.234941720  |
| C | -1.146914850 | -1.429785090 | 2.492862650  |
| C | -2.557041010 | -1.485179490 | -0.722970880 |
| C | 0.156595530  | -1.405143940 | -3.005657810 |
| C | 3.157749270  | -1.531240390 | 1.079706180  |
| C | 0.788840640  | -3.001933210 | 1.092923360  |
| C | -0.588398060 | -2.962904110 | 0.644081520  |
| C | -0.619424780 | -2.999548070 | -0.772764730 |
| C | 0.798509110  | -3.270045980 | -1.318483890 |
| C | 1.780528550  | 5.215722270  | -0.047404020 |
| C | 0.833780420  | 4.918876290  | 1.140511930  |
| C | -0.519259990 | 4.865843520  | 0.694908280  |
| C | -0.529904510 | 4.871757980  | -0.757229860 |
| C | 0.817212780  | 4.926118740  | -1.221157970 |
| C | 1.648160000  | -3.064090620 | -0.052901420 |
| C | 1.163534750  | -2.243237050 | 2.212841560  |
| C | -1.545962630 | -2.212095550 | 1.345519070  |
| C | -1.548873460 | -2.211063880 | -1.430863410 |
| C | 1.176447810  | -2.196085470 | -2.319495140 |
| C | 2.861207730  | 4.154349800  | -0.059391350 |
| C | 1.174839920  | 4.118333640  | 2.230900740  |
| C | -1.473371460 | 4.116282060  | 1.394804260  |
| C | -1.495355460 | 4.128683810  | -1.449100690 |
| C | 1.142634040  | 4.130541690  | -2.319660130 |
| C | 2.815083600  | -2.334259000 | -0.059257480 |
| C | 3.123056830  | -0.736656630 | 4.487766670  |
| C | 1.008344570  | 2.568528530  | 5.249636480  |
| C | -3.093896570 | 2.563063090  | 3.916213420  |
| C | -4.452696910 | -0.700751380 | 2.136765700  |
| C | -4.448692670 | -0.651238740 | -2.159435820 |
| C | -3.169899110 | 2.627459710  | -3.982021190 |
| C | 0.900473640  | 2.593587410  | -5.317734180 |
| C | 2.967832040  | -0.743147730 | -4.720842310 |
| C | 4.750918510  | -2.414963090 | -1.728477880 |
| C | 0.885015040  | -4.692410110 | -1.919625600 |
| F | 1.595444140  | 3.743328970  | -5.509427850 |
| F | 1.523326800  | 1.618964590  | -6.031364230 |
| F | -0.331071590 | 2.761469150  | -5.878048170 |
| F | 3.726672410  | 0.255344670  | -5.225729140 |
| F | 3.790194640  | -1.822993950 | -4.576946640 |
| F | 2.054852430  | -1.096567770 | -5.670175100 |

|   |              |              |              |
|---|--------------|--------------|--------------|
| F | -3.463472040 | 1.577223820  | -4.794010160 |
| F | -2.703970150 | 3.619680010  | -4.784857450 |
| F | -4.340748860 | 3.079744780  | -3.452241410 |
| F | -5.325208420 | 0.334932430  | 2.144062350  |
| F | -4.321916360 | -1.148095000 | 3.416744290  |
| F | -5.054389030 | -1.710311650 | 1.443282140  |
| F | -5.354953780 | -0.891339470 | -1.172317540 |
| F | -4.953936900 | 0.345822390  | -2.923895670 |
| F | -4.392324240 | -1.771156390 | -2.936492080 |
| F | -3.801799140 | 3.688345690  | 3.625539690  |
| F | -3.993318910 | 1.564722780  | 4.125533850  |
| F | -2.460927650 | 2.772789980  | 5.099224990  |
| F | 2.227943250  | 3.106231160  | 5.508993770  |
| F | 0.085753700  | 3.478060810  | 5.665209660  |
| F | 0.861755320  | 1.476895340  | 6.051470770  |
| F | 4.404551910  | -1.070411830 | 4.157759970  |
| F | 3.195117440  | 0.269385680  | 5.389664310  |
| F | 2.580663040  | -1.817391910 | 5.126184530  |
| F | 5.519517210  | -1.647657650 | -2.543386920 |
| F | 5.508539370  | -2.698193010 | -0.629125040 |
| F | 4.515902200  | -3.591968190 | -2.362929560 |
| F | 2.137736700  | -5.005880220 | -2.329800340 |
| F | 0.058494180  | -4.816400620 | -2.997947010 |
| F | 0.507491410  | -5.636342340 | -1.010929620 |
| C | 2.319981140  | 6.726639030  | -0.044633190 |
| C | 4.101688310  | 10.987560620 | 3.520286430  |
| C | 7.185298190  | 10.963891410 | 0.668482890  |
| C | 5.430230290  | 11.013149540 | -3.141761450 |
| C | 1.273515330  | 11.021451960 | -2.685916090 |
| C | 0.496369050  | 11.045390540 | -1.469117820 |
| C | 1.316196220  | 10.983661350 | 2.646105330  |
| C | 5.471221690  | 10.986669490 | 3.059498000  |
| C | 7.169768340  | 10.969315040 | -0.773712010 |
| C | 4.057810640  | 11.019777460 | -3.573738500 |
| C | 0.516187070  | 11.013089290 | 1.450905280  |
| C | 3.366563440  | 12.174721240 | 3.462219940  |
| C | 7.174599420  | 12.250575310 | 1.492595650  |
| C | 5.995579460  | 12.190462690 | -2.635744320 |
| C | 1.786573730  | 12.315342920 | -3.291761020 |
| C | 0.345954990  | 9.830714280  | 0.696792460  |
| C | 3.311153650  | 9.689853210  | 3.736554820  |
| C | 6.874097900  | 9.784992600  | 1.351184150  |
| C | 6.193358460  | 9.715059520  | -2.877001690 |
| C | 1.898533330  | 9.818265940  | -3.054151140 |

|   |             |              |              |
|---|-------------|--------------|--------------|
| C | 0.335555080 | 9.844900140  | -0.727244300 |
| C | 1.943673170 | 9.782237870  | 2.999679230  |
| C | 6.222929000 | 9.691651690  | 2.761636280  |
| C | 6.853765080 | 9.799041220  | -1.467161860 |
| C | 3.264050240 | 9.731225580  | -3.793749990 |
| C | 0.321273380 | 12.238566200 | -0.703399030 |
| C | 1.827454340 | 12.272990520 | 3.270466380  |
| C | 6.039973870 | 12.158409550 | 2.560457150  |
| C | 7.134650320 | 12.265426460 | -1.578992650 |
| C | 3.318977450 | 12.200105610 | -3.472052690 |
| C | 0.359116610 | 12.222887650 | 0.695647600  |
| C | 3.957811040 | 13.361806970 | 2.965748930  |
| C | 6.662086170 | 13.422869190 | 0.653023130  |
| C | 5.236013500 | 13.377259660 | -2.567996100 |
| C | 1.701346840 | 13.507136910 | -2.305259700 |
| C | 0.933531570 | 8.576045560  | 1.109680020  |
| C | 3.948545750 | 8.527149320  | 2.973373010  |
| C | 6.558679460 | 8.608112040  | 0.637545080  |
| C | 5.222741360 | 8.551554020  | -2.655261070 |
| C | 1.702754520 | 8.618088080  | -2.325432280 |
| C | 0.919050820 | 8.593653190  | -1.159561310 |
| C | 1.731744290 | 8.587848400  | 2.268125410  |
| C | 5.254686960 | 8.524017180  | 2.552526170  |
| C | 6.552034480 | 8.613924330  | -0.761150700 |
| C | 3.911774330 | 8.559171720  | -3.057951770 |
| C | 0.649970160 | 13.643740070 | -1.229624160 |
| C | 1.737449120 | 13.467741470 | 2.304829600  |
| C | 5.281433360 | 13.350158030 | 2.513880610  |
| C | 6.647758670 | 13.433774470 | -0.720308300 |
| C | 3.903483140 | 13.373345450 | -2.966650910 |
| C | 0.958030970 | 13.463361200 | 1.159923730  |
| C | 3.326846660 | 14.934193350 | 1.153996210  |
| C | 4.697868120 | 14.899275400 | 0.686193710  |
| C | 4.709679160 | 14.948273700 | -0.730581060 |
| C | 3.284485420 | 15.223323080 | -1.254653010 |
| C | 3.282766760 | 7.013264820  | 1.132840730  |
| C | 4.629648420 | 7.070300570  | 0.669435300  |
| C | 4.620584420 | 7.077067720  | -0.782730320 |
| C | 3.267271070 | 7.026599720  | -1.228782690 |
| C | 2.452083150 | 15.006239360 | 0.020490910  |
| C | 2.967415070 | 14.165703810 | 2.272273040  |
| C | 5.664829300 | 14.142466100 | 1.368019120  |
| C | 5.630110900 | 14.165695270 | -1.408105180 |
| C | 2.893034130 | 14.158115420 | -2.259818180 |

|   |              |              |              |
|---|--------------|--------------|--------------|
| C | 1.239154310  | 7.787885520  | -0.032799080 |
| C | 2.956501800  | 7.804129910  | 2.234730990  |
| C | 5.593132830  | 7.813851960  | 1.362881730  |
| C | 5.576524450  | 7.826337570  | -1.481099810 |
| C | 2.926980960  | 7.831738500  | -2.315779210 |
| C | 1.285160860  | 14.276365940 | 0.023514600  |
| C | 1.037358970  | 12.637838930 | 4.558953190  |
| C | 3.163533360  | 9.327404940  | 5.264183100  |
| C | 7.248108620  | 9.345133180  | 3.875108300  |
| C | 8.582170340  | 12.624681830 | 2.106272180  |
| C | 8.519838730  | 12.612701060 | -2.189482380 |
| C | 7.216535390  | 9.349878470  | -4.023213290 |
| C | 3.128215540  | 9.394920650  | -5.303374700 |
| C | 1.069212650  | 12.726000810 | -4.649324510 |
| C | -0.673088870 | 14.371404180 | -1.618615570 |
| C | 3.189790730  | 16.650881930 | -1.842124650 |
| F | 2.431001710  | 8.246626330  | -5.495591120 |
| F | 2.495231060  | 10.375509370 | -5.999647390 |
| F | 4.351977110  | 9.232350230  | -5.882004470 |
| F | 0.303461150  | 11.731930620 | -5.152460150 |
| F | 0.249003440  | 13.804555730 | -4.484840310 |
| F | 1.969225810  | 13.087673230 | -5.607891090 |
| F | 7.499838950  | 10.407373630 | -4.829396930 |
| F | 6.739421120  | 8.365246490  | -4.828800040 |
| F | 8.394095770  | 8.892271760  | -3.513206050 |
| F | 9.455094680  | 11.589433690 | 2.091477260  |
| F | 8.469156520  | 13.059780600 | 3.392148630  |
| F | 9.173743600  | 13.641120970 | 1.414104080  |
| F | 9.439320670  | 12.844442010 | -1.212629630 |
| F | 9.014834080  | 11.622359980 | -2.969224540 |
| F | 8.452922600  | 13.739270220 | -2.956009220 |
| F | 7.951408720  | 8.222188290  | 3.564820060  |
| F | 8.150813130  | 10.341422660 | 4.080023840  |
| F | 6.632014720  | 9.125485850  | 5.065190440  |
| F | 1.948265500  | 8.785368680  | 5.534594560  |
| F | 4.092934720  | 8.415873120  | 5.659733090  |
| F | 3.318826140  | 10.412224540 | 6.073564770  |
| F | -0.248368720 | 12.973583860 | 4.248057970  |
| F | 0.977228960  | 11.623613700 | 5.452507680  |
| F | 1.586969930  | 13.713171530 | 5.200366590  |
| F | -1.452667710 | 13.611130530 | -2.429678510 |
| F | -1.415729060 | 14.644970780 | -0.506665540 |
| F | -0.446690420 | 15.553910550 | -2.245927740 |
| F | 1.931554710  | 16.967795810 | -2.232315510 |

|   |             |              |              |
|---|-------------|--------------|--------------|
| F | 4.001425720 | 16.784348740 | -2.930563990 |
| F | 3.579765990 | 17.586886690 | -0.930494440 |
